# Supplementary material
Source: Research Square preprint supplement (doi:10.21203/rs.3.rs-10003173/v1)
Supplement: Supplementary file 1 [file 2f440624dc8eb511afd4247f.docx]

# Appendix Table 1. Registered and estimated unregistered consumption of nicotine products (grams per capita aged 15 years and older) in Norway, 1909–2025

|  | **Registered** | | | | | | **Estimated unregistered** | | | | | |  |
| --- | --- | --- | --- | --- | --- | --- | --- | --- | --- | --- | --- | --- | --- |
| **Year** | **Plug tobacco** | **Snus** | **Pipe tobacco** | **Cigars** | **Rolling tobacco** | **Cigarettes** | **Plug tobacco** | **Snus** | **Pipe tobacco** | **Cigars** | **Rolling tobacco** | **Cigarettes** | **Total** |
| 1909 | 995 | 125 | 264 | 56 |  | 30 |  |  |  |  |  |  | 1470 |
| 1910 | 965 | 150 | 290 | 60 |  | 45 |  |  |  |  |  |  | 1510 |
| 1911 | 945 | 155 | 315 | 65 |  | 60 |  |  |  |  |  |  | 1540 |
| 1912 | 930 | 160 | 330 | 70 |  | 85 |  |  |  |  |  |  | 1575 |
| 1913 | 915 | 145 | 340 | 75 |  | 100 |  |  |  |  |  |  | 1575 |
| 1914 | 900 | 140 | 350 | 80 |  | 115 |  |  |  |  |  |  | 1585 |
| 1915 | 890 | 130 | 360 | 90 |  | 130 |  |  |  |  |  |  | 1600 |
| 1916 | 876 | 204 | 376 | 108 |  | 129 |  |  |  |  |  |  | 1693 |
| 1917 | 800 | 200 | 370 | 100 |  | 140 |  |  |  |  |  |  | 1610 |
| 1918 | 720 | 230 | 380 | 90 |  | 150 |  |  |  |  |  |  | 1570 |
| 1919 | 680 | 220 | 400 | 80 |  | 160 |  |  |  |  |  |  | 1540 |
| 1920 | 660 | 230 | 420 | 70 |  | 170 |  |  |  |  |  |  | 1550 |
| 1921 | 600 | 270 | 430 | 60 |  | 180 |  |  |  |  |  |  | 1540 |
| 1922 | 580 | 270 | 450 | 50 |  | 190 |  |  |  |  |  |  | 1540 |
| 1923 | 560 | 260 | 460 | 40 |  | 210 |  |  |  |  |  |  | 1530 |
| 1924 | 540 | 260 | 470 | 30 |  | 220 |  |  |  |  |  |  | 1520 |
| 1925 | 520 | 280 | 475 | 20 |  | 240 |  |  |  |  |  |  | 1535 |
| 1926 | 500 | 260 | 480 | 20 |  | 250 |  |  |  |  |  |  | 1510 |
| 1927 | 480 | 240 | 483 | 14 |  | 262 |  |  |  |  |  |  | 1479 |
| 1928 | 478 | 241 | 495 | 16 | 1 | 258 |  |  |  |  |  |  | 1489 |
| 1929 | 486 | 239 | 518 | 14 | 2 | 273 |  |  |  |  |  |  | 1532 |
| 1930 | 459 | 231 | 546 | 15 | 3 | 305 |  |  |  |  |  |  | 1559 |
| 1931 | 399 | 201 | 559 | 13 | 4 | 273 |  |  |  |  |  |  | 1449 |
| 1932 | 370 | 206 | 559 | 18 | 5 | 277 |  |  |  |  |  |  | 1435 |
| 1933 | 324 | 192 | 564 | 16 | 8 | 281 |  |  |  |  |  |  | 1385 |
| 1934 | 307 | 181 | 569 | 20 | 9 | 289 |  |  |  |  |  |  | 1375 |
| 1935 | 302 | 181 | 599 | 22 | 15 | 299 |  |  |  |  |  |  | 1418 |
| 1936 | 288 | 186 | 629 | 22 | 18 | 346 |  |  |  |  |  |  | 1489 |
| 1937 | 270 | 194 | 650 | 26 | 19 | 387 |  |  |  |  |  |  | 1546 |
| 1938 | 260 | 204 | 662 | 26 | 25 | 365 |  |  |  |  |  |  | 1542 |
| 1939 | 247 | 205 | 688 | 31 | 44 | 395 |  |  |  |  |  |  | 1610 |
| 1940 | 229 | 229 | 590 | 34 | 180 | 376 |  |  |  |  |  |  | 1638 |
| 1941 | 149 | 225 | 468 | 20 | 192 | 285 |  |  |  |  |  |  | 1339 |
| 1942 | 129 | 188 | 330 | 12 | 127 | 260 |  |  |  |  |  |  | 1046 |
| 1943 | 100 | 156 | 238 | 7 | 96 | 197 |  |  |  |  |  |  | 794 |
| 1944 | 84 | 108 | 215 | 5 | 104 | 247 |  |  |  |  |  |  | 763 |
| 1945 | 84 | 118 | 407 | 5 | 64 | 374 |  |  |  |  |  |  | 1052 |
| 1946 | 217 | 204 | 512 | 8 | 169 | 582 |  |  |  |  |  |  | 1692 |
| 1947 | 176 | 207 | 847 | 14 | 87 | 608 |  |  |  |  |  |  | 1939 |
| 1948 | 183 | 225 | 802 | 25 | 144 | 472 |  |  |  |  |  |  | 1851 |
| 1949 | 142 | 226 | 673 | 20 | 266 | 492 |  |  |  |  |  |  | 1819 |
| 1950 | 127 | 226 | 739 | 17 | 248 | 467 |  |  |  |  |  |  | 1824 |
| 1951 | 121 | 225 | 713 | 13 | 271 | 467 |  |  |  |  |  |  | 1810 |
| 1952 | 114 | 225 | 743 | 13 | 287 | 465 |  |  |  |  |  |  | 1847 |
| 1953 | 106 | 217 | 722 | 15 | 306 | 510 |  |  |  |  |  |  | 1876 |
| 1954 | 99 | 216 | 725 | 19 | 309 | 497 |  |  |  |  |  |  | 1865 |
| 1955 | 92 | 212 | 722 | 20 | 306 | 530 |  |  |  |  |  |  | 1882 |
| 1956 | 91 | 206 | 688 | 20 | 341 | 567 |  |  |  |  |  |  | 1913 |
| 1957 | 85 | 198 | 684 | 22 | 343 | 539 |  |  |  |  |  |  | 1871 |
| 1958 | 83 | 191 | 705 | 23 | 375 | 532 |  |  |  |  |  |  | 1909 |
| 1959 | 72 | 186 | 716 | 24 | 413 | 558 |  |  |  |  |  |  | 1969 |
| 1960 | 71 | 177 | 769 | 23 | 427 | 538 |  |  |  |  |  |  | 2005 |
| 1961 | 66 | 176 | 530 | 30 | 677 | 534 |  |  |  |  |  |  | 2013 |
| 1962 | 60 | 167 | 464 | 32 | 791 | 545 |  |  |  |  |  |  | 2059 |
| 1963 | 55 | 160 | 419 | 36 | 858 | 515 |  |  |  |  |  |  | 2043 |
| 1964 | 52 | 155 | 528 | 51 | 774 | 504 |  |  |  |  |  |  | 2064 |
| 1965 | 48 | 150 | 401 | 43 | 898 | 506 |  |  |  |  |  |  | 2046 |
| 1966 | 44 | 141 | 399 | 38 | 958 | 529 |  |  |  |  |  |  | 2109 |
| 1967 | 39 | 132 | 406 | 41 | 978 | 531 |  |  |  |  |  |  | 2127 |
| 1968 | 39 | 137 | 392 | 48 | 1017 | 588 |  |  |  |  |  |  | 2221 |
| 1969 | 37 | 97 | 286 | 41 | 1103 | 626 |  |  |  |  |  |  | 2190 |
| 1970 | 31 | 106 | 403 | 37 | 1038 | 634 |  |  |  |  |  |  | 2249 |
| 1971 | 33 | 107 | 304 | 40 | 1048 | 627 |  |  |  |  |  |  | 2159 |
| 1972 | 30 | 98 | 211 | 36 | 1185 | 640 |  |  |  |  |  |  | 2201 |
| 1973 | 27 | 93 | 340 | 37 | 1126 | 600 |  |  |  |  |  |  | 2223 |
| 1974 | 28 | 93 | 154 | 31 | 1306 | 587 |  |  |  |  |  |  | 2199 |
| 1975 | 21 | 86 | 220 | 30 | 1319 | 561 |  |  |  |  |  |  | 2236 |
| 1976 | 23 | 90 | 228 | 29 | 1239 | 583 |  |  |  |  |  |  | 2193 |
| 1977 | 22 | 81 | 188 | 32 | 1220 | 588 |  |  |  |  |  |  | 2131 |
| 1978 | 21 | 89 | 195 | 31 | 1196 | 621 |  |  |  |  |  |  | 2153 |
| 1979 | 19 | 84 | 171 | 28 | 1196 | 628 |  |  |  |  |  |  | 2126 |
| 1980 | 18 | 82 | 127 | 26 | 1253 | 664 |  |  |  |  |  |  | 2171 |
| 1981 | 18 | 83 | 69 | 25 | 1270 | 640 |  |  |  |  |  |  | 2105 |
| 1982 | 16 | 81 | 172 | 21 | 1169 | 602 |  |  |  |  |  |  | 2061 |
| 1983 | 14 | 77 | 63 | 19 | 1222 | 550 |  |  |  |  |  |  | 1945 |
| 1984 | 13 | 78 | 155 | 20 | 1111 | 566 |  |  |  |  |  |  | 1943 |
| 1985 | 12 | 86 | 130 | 19 | 1078 | 633 |  |  |  |  |  |  | 1959 |
| 1986 | 12 | 86 | 144 | 18 | 1010 | 735 |  |  |  |  |  |  | 2004 |
| 1987 | 11 | 80 | 92 | 16 | 991 | 793 |  |  |  |  |  |  | 1982 |
| 1988 | 9 | 81 | 130 | 14 | 912 | 835 |  |  |  |  |  |  | 1981 |
| 1989 | 8 | 82 | 112 | 15 | 897 | 841 |  |  |  |  |  |  | 1955 |
| 1990 | 7 | 83 | 86 | 14 | 912 | 853 | 1 | 8 | 9 | 1 | 92 | 86 | 2152 |
| 1991 | 6 | 82 | 90 | 14 | 911 | 853 | 1 | 10 | 11 | 2 | 115 | 108 | 2203 |
| 1992 | 6 | 81 | 105 | 14 | 898 | 875 | 1 | 12 | 15 | 2 | 130 | 126 | 2265 |
| 1993 | 6 | 78 | 55 | 13 | 854 | 761 | 1 | 11 | 8 | 2 | 122 | 108 | 2019 |
| 1994 | 5 | 88 | 84 | 13 | 871 | 796 | 1 | 14 | 13 | 2 | 134 | 123 | 2144 |
| 1995 | 5 | 87 | 116 | 12 | 710 | 732 | 1 | 15 | 21 | 2 | 126 | 130 | 1957 |
| 1996 | 5 | 93 | 2 | 24 | 828 | 739 | 1 | 21 | 1 | 5 | 184 | 164 | 2066 |
| 1997 | 5 | 95 | 11 | 12 | 785 | 757 | 1 | 17 | 2 | 2 | 143 | 138 | 1969 |
| 1998 | 5 | 104 | 16 | 13 | 749 | 776 | 2 | 49 | 8 | 6 | 355 | 368 | 2449 |
| 1999 | 4 | 104 | 11 | 14 | 674 | 747 | 2 | 37 | 4 | 5 | 238 | 264 | 2104 |
| 2000 | 4 | 103 | 12 | 15 | 619 | 756 | 2 | 39 | 5 | 6 | 237 | 289 | 2086 |
| 2001 | 4 | 105 | 16 | 11 | 561 | 737 | 1 | 39 | 6 | 4 | 207 | 272 | 1962 |
| 2002 | 4 | 111 | 6 | 10 | 544 | 716 | 1 | 37 | 2 | 3 | 180 | 237 | 1850 |
| 2003 | 4 | 120 | 8 | 9 | 489 | 683 | 2 | 63 | 4 | 5 | 258 | 360 | 2007 |
| 2004 | 4 | 140 | 11 | 9 | 393 | 680 | 3 | 102 | 8 | 6 | 285 | 493 | 2133 |
| 2005 | 4 | 170 | 2 | 9 | 319 | 639 | 2 | 82 | 1 | 4 | 154 | 310 | 1695 |
| 2006 | 4 | 185 | 9 | 8 | 278 | 630 | 3 | 147 | 7 | 6 | 221 | 502 | 2001 |
| 2007 | 4 | 212 | 5 | 8 | 265 | 630 | 2 | 95 | 2 | 3 | 118 | 281 | 1625 |
| 2008 | 4 | 244 | 5 | 7 | 260 | 627 | 3 | 224 | 5 | 7 | 239 | 577 | 2202 |
| 2009 | 3 | 274 | 4 | 7 | 255 | 618 | 2 | 175 | 2 | 4 | 163 | 393 | 1900 |
| 2010 | 3 | 295 | 0 | 6 | 245 | 573 | 3 | 221 | 0 | 5 | 183 | 429 | 1962 |
| 2011 | 3 | 300 | 9 | 6 | 207 | 548 | 1 | 138 | 4 | 3 | 95 | 252 | 1566 |
| 2012 | 3 | 261 | 3 | 5 | 176 | 500 | 2 | 157 | 2 | 3 | 106 | 301 | 1520 |
| 2013 | 3 | 299 | 4 | 5 | 162 | 450 | 2 | 198 | 3 | 3 | 108 | 299 | 1535 |
| 2014 | 3 | 306 | 0 | 4 | 137 | 387 | 2 | 224 | 0 | 3 | 101 | 283 | 1449 |
| 2015 | 2 | 300 | 5 | 4 | 145 | 420 | 1 | 170 | 4 | 3 | 110 | 319 | 1483 |
| 2016 | 2 | 317 | 0 | 5 | 158 | 444 | 2 | 203 | 0 | 3 | 99 | 279 | 1512 |
| 2017 | 2 | 300 | 0 | 3 | 113 | 344 | 1 | 219 | 0 | 3 | 105 | 318 | 1407 |
| 2018 | 2 | 334 | 0 | 3 | 109 | 346 | 1 | 233 | 0 | 2 | 87 | 279 | 1396 |
| 2019 | 2 | 339 | 0 | 3 | 102 | 331 | 2 | 336 | 0 | 2 | 81 | 261 | 1457 |
| 2020 | 2 | 408 | 2 | 3 | 105 | 372 | 1 | 143 | 1 | 1 | 45 | 160 | 1243 |
| 2021 | 2 | 540 | 2 | 4 | 124 | 442 | 0 | 83 | 0 | 1 | 18 | 64 | 1281 |
| 2022 | 2 | 521 | 0 | 4 | 100 | 362 | 1 | 216 | 0 | 3 | 75 | 270 | 1552 |
| 2023 | 1 | 464 | 0 | 3 | 79 | 306 | 1 | 194 | 0 | 2 | 46 | 181 | 1276 |
| 2024 | 1 | 476 | 2 | 3 | 70 | 298 | 1 | 193 | 2 | 2 | 62 | 266 | 1376 |
| 2025 | 1 | 498 | 2 | 3 | 64 | 292 | 0 | 178 | 1 | 2 | 34 | 157 | 1233 |
